# Supplementary material
Source: Springer Nature journal article supplement (https://www.springermedizin.de/resource/supplementary/13017_2009_146_MOESM2_ESM.pdf/9635566)

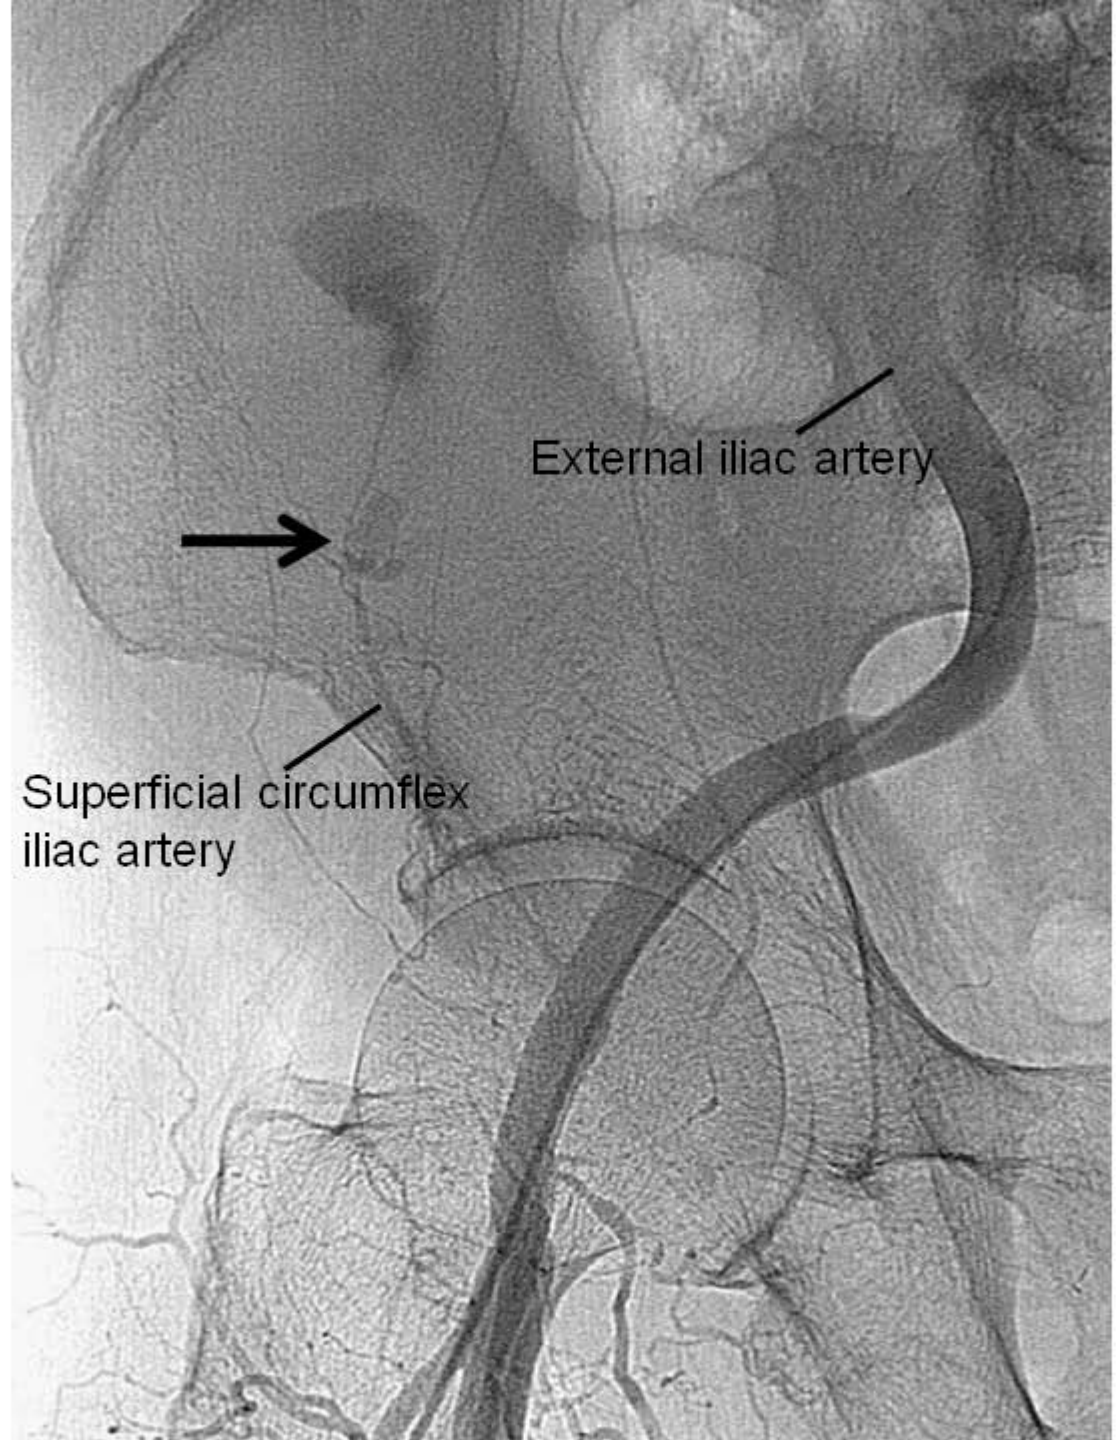

External iliac artery

Superficial circumflex  
iliac artery

Supplement: MOESM2 [file 9635566]
